# Supplementary material for: Plitidepsin in adult patients with COVID-19 requiring hospital admission: A long-term follow-up analysis
Source: PubMed Central journal article supplement (PMC9992643; doi:10.3389/fcimb.2023.1097809), 2023-02-22
Supplement: DataSheet_1.pdf [file DataSheet_1.pdf]

## *Supplementary Material*

### **Plitidepsin in Adult Patients with COVID-19 Requiring Hospital Admission: A Long-term Follow-up Analysis**

**Jose F Varona<sup>1,2\*</sup>, Pedro Landete<sup>3,4</sup>, Roger Paredes<sup>5,6</sup>, Roberto Vates<sup>7</sup>, Miguel Torralba<sup>8,9</sup>, Pablo Guisado-Vasco<sup>10,11</sup>, Lourdes Porras<sup>12</sup>, Patricia Muñoz<sup>13</sup>, Paloma Gijon<sup>13</sup>, Julio Ancochea<sup>3,4</sup>, Elena Saiz<sup>14</sup>, Fernanda Meira<sup>14</sup>, Jose M Jimeno<sup>14</sup>, Jose A Lopez-Martin<sup>14</sup>, Vicente Estrada<sup>15,16</sup>**

<sup>1</sup>Departamento de Medicina Interna, Hospital Universitario HM Montepíncipe, HM Hospitales, Madrid, Spain [jfvarona@hmhospitales.com](mailto:jfvarona@hmhospitales.com).

<sup>2</sup>Facultad de Medicina, Universidad San Pablo-CEU, Madrid, Spain.

<sup>3</sup>Departamento de Neumología, Hospital Universitario La Princesa, Madrid, Spain.

<sup>4</sup>Facultad de Medicina, Universidad Autónoma de Madrid, Madrid, Spain.

<sup>5</sup>Infectious Diseases Department, IrsiCaixa AIDS Research Institute, Barcelona, Spain.

<sup>6</sup>Servicio de Enfermedades Infecciosas, Hospital Germans Trias I Pujol, Badalona, Spain.

<sup>7</sup>Internal Medicine Department, Hospital Universitario de Getafe, Madrid, Spain.

<sup>8</sup>Medicine Department, Health Sciences Faculty, University of Alcalá, Madrid, Spain.

<sup>9</sup>Internal Medicine Department, Guadalajara University Hospital, Guadalajara, Spain.

<sup>10</sup>Internal Medicine Department, Hospital Universitario Quironsalud Madrid, Madrid, Spain.

<sup>11</sup>Departamento de Medicina, Facultad de Ciencias Biomédicas y de la Salud, Universidad Europea, Madrid, Spain.

<sup>12</sup>Internal Medicine, Hospital General de Ciudad Real, Ciudad Real, Spain.

<sup>13</sup>Clinical Microbiology and Infectious Diseases Department, Instituto de Investigación Sanitaria Gregorio Marañón (IiSGM), Hospital General Universitario Gregorio Marañón, Madrid, Spain.

<sup>14</sup>Virology Unit, PharmaMar, SA, Madrid, Spain

<sup>15</sup>Departamento de Medicina Interna, Hospital Clínico San Carlos, Madrid, Spain.

<sup>16</sup>Facultad de Medicina, Universidad Complutense de Madrid, Madrid, Spain.

#### **\* Correspondence:**

Corresponding Author

**Jose Felipe Varona Arche at [jfvarona@hmhospitales.com](mailto:jfvarona@hmhospitales.com)**

**Keywords:** Plitidepsin; COVID-19; SARS-CoV-2; long COVID; post-COVID-19 complications

**Supplementary Tables**

**Supplementary Table 1.** Prevalent post-COVID-19 complications previously reported in published analysis.

| <b>List of COVID-19 complications</b> |
|---------------------------------------|
| Fatigue/asthenia                      |
| General malaise                       |
| Headaches                             |
| Low mood                              |
| Muscle aches and pains                |
| Joint pains                           |
| Attention deficit                     |
| Chest pressure                        |
| Anxiety                               |
| Febricula                             |
| Cough                                 |
| Memory lapses                         |
| Diarrhea                              |
| Palpitations                          |
| Dizziness                             |
| Tingling in extremity                 |
| Others (specify)                      |

**Supplementary Table 2.** Pharmacological treatments at study entry

| Pharmacological treatment                                      |                                                      | 1.5 mg |      | 2 mg |      | 2.5 mg |      | Total |      |
|----------------------------------------------------------------|------------------------------------------------------|--------|------|------|------|--------|------|-------|------|
|                                                                |                                                      | N      | %    | N    | %    | N      | %    | N     | %    |
| <b>Has the patient received any pharmacological treatment?</b> |                                                      | 7      | 77.8 | 12   | 85.7 | 10     | 90.9 | 29    | 85.3 |
| <b>Alimentary tract and metabolism</b>                         | <b>Drugs for acid-related disorders</b>              | 2      | 22.2 | 3    | 21.4 | 1      | 9.1  | 6     | 17.6 |
|                                                                | <b>Drugs used in diabetes</b>                        | 2      | 22.2 | 6    | 42.9 | 4      | 36.4 | 12    | 35.3 |
|                                                                | <b>Vitamins</b>                                      | 2      | 22.2 | 2    | 14.3 | 1      | 9.1  | 5     | 14.7 |
| <b>Anti-infectives for systemic use</b>                        | <b>Antibacterials for systemic use</b>               | 1      | 11.1 | 1    | 7.1  | .      | .    | 2     | 5.9  |
|                                                                | <b>Antivirals for systemic use</b>                   | .      | .    | .    | .    | 1      | 9.1  | 1     | 2.9  |
| <b>Blood and blood-forming organs</b>                          | <b>Antithrombotic agents</b>                         | 3      | 33.3 | 3    | 21.4 | .      | .    | 6     | 17.6 |
|                                                                | <b>Antianemic preparations</b>                       | .      | .    | 1    | 7.1  | .      | .    | 1     | 2.9  |
| <b>Cardiovascular system</b>                                   | <b>Beta blocking agents</b>                          | 1      | 11.1 | 1    | 7.1  | .      | .    | 2     | 5.9  |
|                                                                | <b>Cardiac therapy</b>                               | 1      | 11.1 | 1    | 7.1  | .      | .    | 2     | 5.9  |
|                                                                | <b>Lipid modifying agents</b>                        | 5      | 55.6 | 4    | 28.6 | 4      | 36.4 | 13    | 38.2 |
|                                                                | <b>Agents acting on the renin-angiotensin system</b> | .      | .    | 3    | 21.4 | 2      | 18.2 | 5     | 14.7 |
|                                                                | <b>Antihypertensives</b>                             | .      | .    | 1    | 7.1  | .      | .    | 1     | 2.9  |
|                                                                | <b>Calcium channel blockers</b>                      | .      | .    | 2    | 14.3 | 2      | 18.2 | 4     | 11.8 |
|                                                                | <b>Diuretics</b>                                     | .      | .    | 2    | 14.3 | .      | .    | 2     | 5.9  |
| <b>Dermatologicals</b>                                         | <b>Antifungals for dermatological use</b>            | 1      | 11.1 | 1    | 7.1  | .      | .    | 2     | 5.9  |
| <b>Musculo-skeletal system</b>                                 | <b>Anti-inflammatory and antirheumatic products</b>  | 2      | 22.2 | 3    | 21.4 | 3      | 27.3 | 8     | 23.5 |
|                                                                | <b>Drugs for treatment of bone diseases</b>          | 1      | 11.1 | .    | .    | .      | .    | 1     | 2.9  |
|                                                                | <b>Muscle relaxants</b>                              | 1      | 11.1 | 2    | 14.3 | .      | .    | 3     | 8.8  |
|                                                                | <b>Antigout preparations</b>                         | 1      | 11.1 | 2    | 14.3 | 1      | 9.1  | 4     | 11.8 |
| <b>Nervous system</b>                                          | <b>Analgesics</b>                                    | 2      | 22.2 | 4    | 28.6 | 2      | 18.2 | 8     | 23.5 |
|                                                                | <b>Psychoanaleptics</b>                              | 2      | 22.2 | 1    | 7.1  | 1      | 9.1  | 4     | 11.8 |

| Pharmacological treatment                                           |  | 1.5 mg                                |   | 2 mg |      | 2.5 mg |      | Total |      |   |      |
|---------------------------------------------------------------------|--|---------------------------------------|---|------|------|--------|------|-------|------|---|------|
|                                                                     |  | N                                     | % | N    | %    | N      | %    | N     | %    |   |      |
| Pharmacological treatment                                           |  | Psycoleptics                          |   | 1    | 11.1 | 1      | 7.1  | .     | .    | 2 | 5.9  |
|                                                                     |  | Anti-Parkinson drugs                  |   | .    | .    | 1      | 7.1  | .     | .    | 1 | 2.9  |
| Respiratory system                                                  |  | Antihistamines for systemic use       |   | 1    | 11.1 | .      | .    | 2     | 18.2 | 3 | 8.8  |
|                                                                     |  | Drugs for obstructive airway diseases |   | 1    | 11.1 | 1      | 7.1  | 2     | 18.2 | 4 | 11.8 |
|                                                                     |  | Nasal preparations                    |   | .    | .    | 1      | 7.1  | .     | .    | 1 | 2.9  |
| Systemic hormonal preparations, excluding sex hormones and insulins |  | Corticosteroids for systemic use      |   | 2    | 22.2 | 2      | 14.3 | .     | .    | 4 | 11.8 |
|                                                                     |  | Thyroid therapy                       |   | 1    | 11.1 | 2      | 14.3 | 1     | 9.1  | 4 | 11.8 |
| Genitourinary system and hormones                                   |  | Urologicals                           |   | .    | .    | 2      | 14.3 | 2     | 18.2 | 4 | 11.8 |
|                                                                     |  | Other gynecologicals                  |   | .    | .    | .      | .    | 1     | 9.1  | 1 | 2.9  |

**Supplementary Table 3.** Blood laboratory parameters at study entry

|                                                     | <b>1.5 mg<br/>N=9</b>  | <b>2.0 mg<br/>N=14</b> | <b>2.5 mg<br/>N=11</b> | <b>Total<br/>N=34</b>  |
|-----------------------------------------------------|------------------------|------------------------|------------------------|------------------------|
| <b>Leukocytes-10<sup>9</sup>/L, median (IQR)</b>    | 6.67<br>(5.45-7.7)     | 6<br>(5.36-7.88)       | 7.06<br>(5.54-7.78)    | 6.35<br>(5.45-7.72)    |
| <b>Lymphocytes-10<sup>9</sup>/L, median (IQR)</b>   | 1.8<br>(1.51-2.3)      | 2<br>(1.63-2.56)       | 2.09<br>(1.56-2.6)     | 1.98<br>(1.56-2.56)    |
| <b>Neutrophils - 10<sup>9</sup>/L, median (IQR)</b> | 3.93<br>(3.00-4.37)    | 3.36<br>(2.90-4.10)    | 3.92<br>(3.10-4.72)    | 3.72<br>(3.00-4.52)    |
| <b>Hemoglobin - g/dL, median (IQR)</b>              | 14.40<br>(13.80-15.00) | 14.95<br>(14.50-15.90) | 14.00<br>(13.40-15.40) | 14.60<br>(13.80-15.40) |
| <b>Platelets - 10<sup>9</sup>/L, median (IQR)</b>   | 233<br>(188-337)       | 237<br>(172-278)       | 247<br>(215-316)       | 240.5<br>(182-309)     |
| <b>Ferritin (ng/mL), median (IQR)</b>               | 153<br>(82-196)        | 183<br>(80.5-223)      | 173.3<br>(62.5-323.1)  | 172<br>(65-223)        |
| <b>Creatinine (mg/dL), median (IQR)</b>             | 0.79<br>(0.74-1.00)    | 0.71<br>(0.65-0.89)    | 0.9<br>(0.66-0.98)     | 0.8<br>(0.66-0.93)     |
| <b>CRP (mg/dL), median (IQR)</b>                    | 1.10<br>(0.62-1.2)     | 1.79<br>(0.9-2.9)      | 1.9<br>(1.1-4.37)      | 1.36<br>(0.9-2.9)      |
| <b>ALT (ULN), median (IQR)</b>                      | 0.44<br>(0.39-0.57)    | 0.50<br>(0.45-0.78)    | 0.51<br>(0.41-0.67)    | 0.50<br>(0.41-0.67)    |
| <b>AST(ULN), median (IQR)</b>                       | 0.51<br>(0.46-0.52)    | 0.51<br>(0.45-0.78)    | 0.51<br>(0.48-0.59)    | 0.51<br>(0.46-0.61)    |
| <b>LDH (ULN), median (IQR)</b>                      | 0.73<br>(0.59-0.79)    | 0.78<br>(0.62-0.91)    | 0.94<br>(0.83-1.01)    | 0.82<br>(0.65-0.95)    |
| <b>D-dimer (ng/mL), median (IQR)</b>                | 203<br>(156-247)       | 310<br>(215-408)       | 304<br>(200-500)       | 240.5<br>(201-343)     |

ALT: alanine aminotransferase; AST: aspartate aminotransferase; CRP: C-reactive protein; dL: decilitre; IQR: interquartile range; IU: international unit; L: liter; LDH: lactate dehydrogenase; mg: milligram; N: number; ng: nanogram; x ULN: normalized value respect to the Upper Limit of the Normal range.

**Supplementary Table 4.** Summary of post-COVID-19 complications, regardless of relationship, by dose cohort and overall. Worst per patient.

| Post-COVID-19 complications -<br>Regardless of relationship | 1.5 mg |      | 2 mg |      | 2.5 mg |      | Total |      |
|-------------------------------------------------------------|--------|------|------|------|--------|------|-------|------|
|                                                             | N      | %    | N    | %    | N      | %    | N     | %    |
| Alanine aminotransferase increased                          | 1      | 11.1 | .    | .    | .      | .    | 1     | 2.9  |
| Aspartate aminotransferase increased                        | 1      | 11.1 | .    | .    | .      | .    | 1     | 2.9  |
| Asthenia                                                    | 2      | 22.2 | 8    | 57.1 | 5      | 45.5 | 15    | 44.1 |
| Attention deficit                                           | 2      | 22.2 | 4    | 28.6 | 4      | 36.4 | 10    | 29.4 |
| Blood triglycerides increased                               | 1      | 11.1 | 1    | 7.1  | .      | .    | 2     | 5.9  |
| COVID-19 pneumonia                                          | 1      | 11.1 | .    | .    | .      | .    | 1     | 2.9  |
| Cough                                                       | 1      | 11.1 | 3    | 21.4 | 2      | 18.2 | 6     | 17.6 |
| Diarrhea                                                    | 1      | 11.1 | 2    | 14.3 | 1      | 9.1  | 4     | 11.8 |
| Dizziness                                                   | 1      | 11.1 | 2    | 14.3 | 2      | 18.2 | 5     | 14.7 |
| Fibrin D dimer increased                                    | 1      | 11.1 | .    | .    | .      | .    | 1     | 2.9  |
| Gamma-glutamyltransferase increased                         | 1      | 11.1 | 1    | 7.1  | .      | .    | 2     | 5.9  |
| Interstitial lung disease                                   | 1      | 11.1 | .    | .    | .      | .    | 1     | 2.9  |
| Joint pains                                                 | 1      | 11.1 | 3    | 21.4 | 4      | 36.4 | 8     | 23.5 |
| Low density lipoprotein increased                           | 1      | 11.1 | .    | .    | .      | .    | 1     | 2.9  |
| Memory lapses                                               | 1      | 11.1 | 6    | 42.9 | 3      | 27.3 | 10    | 29.4 |
| Muscle aches and pains                                      | 2      | 22.2 | 3    | 21.4 | 2      | 18.2 | 7     | 20.6 |
| Palpitations                                                | 2      | 22.2 | 1    | 7.1  | 1      | 9.1  | 4     | 11.8 |
| Serum ferritin increased                                    | 1      | 11.1 | 1    | 7.1  | .      | .    | 2     | 5.9  |
| Tingling in extremity                                       | 4      | 44.4 | 6    | 42.9 | 1      | 9.1  | 11    | 32.4 |
| Anxiety                                                     | .      | .    | 5    | 35.7 | .      | .    | 5     | 14.7 |
| Back pain                                                   | .      | .    | 1    | 7.1  | .      | .    | 1     | 2.9  |
| Blood cholesterol increased                                 | .      | .    | 1    | 7.1  | .      | .    | 1     | 2.9  |
| Chest pressure                                              | .      | .    | 1    | 7.1  | .      | .    | 1     | 2.9  |

| Post-COVID-19 complications -<br>Regardless of relationship | 1.5 mg |   | 2 mg |      | 2.5 mg |      | Total |      |
|-------------------------------------------------------------|--------|---|------|------|--------|------|-------|------|
|                                                             | N      | % | N    | %    | N      | %    | N     | %    |
| Chloasma                                                    | .      | . | 1    | 7.1  | .      | .    | 1     | 2.9  |
| Epistaxis                                                   | .      | . | 1    | 7.1  | .      | .    | 1     | 2.9  |
| Febricula                                                   | .      | . | 1    | 7.1  | .      | .    | 1     | 2.9  |
| General malaise                                             | .      | . | 3    | 21.4 | 2      | 18.2 | 5     | 14.7 |
| Headaches                                                   | .      | . | 2    | 14.3 | 2      | 18.2 | 4     | 11.8 |
| Libido decreased                                            | .      | . | 1    | 7.1  | .      | .    | 1     | 2.9  |
| Low mood                                                    | .      | . | 5    | 35.7 | .      | .    | 5     | 14.7 |
| Male sexual dysfunction                                     | .      | . | 1    | 7.1  | .      | .    | 1     | 2.9  |
| Nasal congestion                                            | .      | . | 1    | 7.1  | .      | .    | 1     | 2.9  |
| Oropharyngeal pain                                          | .      | . | 1    | 7.1  | .      | .    | 1     | 2.9  |
| Tremor                                                      | .      | . | 1    | 7.1  | .      | .    | 1     | 2.9  |
| Urinary tract infection                                     | .      | . | 1    | 7.1  | .      | .    | 1     | 2.9  |
| Alopecia                                                    | .      | . | .    | .    | 1      | 9.1  | 1     | 2.9  |
| Diabetic metabolic decompensation                           | .      | . | .    | .    | 1      | 9.1  | 1     | 2.9  |
| Dyspnea                                                     | .      | . | .    | .    | 1      | 9.1  | 1     | 2.9  |
| Hyperglycaemia                                              | .      | . | .    | .    | 1      | 9.1  | 1     | 2.9  |
| Phlebitis                                                   | .      | . | .    | .    | 1      | 9.1  | 1     | 2.9  |

mg: milligram; N: number.

**Supplementary Table 5.** Summary of post-COVID-19 complications, regardless of relationship, by severity of disease. Worst per patient.

| Post-COVID-19 complications -<br>Regardless of relationship | Severity |      |          |      |        |      |       |      |
|-------------------------------------------------------------|----------|------|----------|------|--------|------|-------|------|
|                                                             | Mild     |      | Moderate |      | Severe |      | Total |      |
|                                                             | N        | %    | N        | %    | N      | %    | N     | %    |
| Anxiety                                                     | 2        | 40.0 | 2        | 10.5 | 1      | 10.0 | 5     | 14.7 |
| Asthenia                                                    | 3        | 60.0 | 7        | 36.8 | 5      | 50.0 | 15    | 44.1 |
| Attention deficit                                           | 2        | 40.0 | 6        | 31.6 | 2      | 20.0 | 10    | 29.4 |
| Chloasma                                                    | 1        | 20.0 | .        | .    | .      | .    | 1     | 2.9  |
| Diarrhea                                                    | 2        | 40.0 | 1        | 5.3  | 1      | 10.0 | 4     | 11.8 |
| General malaise                                             | 1        | 20.0 | 3        | 15.8 | 1      | 10.0 | 5     | 14.7 |
| Joint pains                                                 | 2        | 40.0 | 4        | 21.1 | 2      | 20.0 | 8     | 23.5 |
| Low mood                                                    | 1        | 20.0 | 2        | 10.5 | 2      | 20.0 | 5     | 14.7 |
| Memory lapses                                               | 2        | 40.0 | 6        | 31.6 | 2      | 20.0 | 10    | 29.4 |
| Muscle aches and pains                                      | 2        | 40.0 | 3        | 15.8 | 2      | 20.0 | 7     | 20.6 |
| Oropharyngeal pain                                          | 1        | 20.0 | .        | .    | .      | .    | 1     | 2.9  |
| Tingling in extremity                                       | 3        | 60.0 | 5        | 26.3 | 3      | 30.0 | 11    | 32.4 |
| Alopecia                                                    | .        | .    | 1        | 5.3  | .      | .    | 1     | 2.9  |
| Back pain                                                   | .        | .    | 1        | 5.3  | .      | .    | 1     | 2.9  |
| Chest pressure                                              | .        | .    | 1        | 5.3  | .      | .    | 1     | 2.9  |
| Cough                                                       | .        | .    | 4        | 21.1 | 2      | 20.0 | 6     | 17.6 |
| Diabetic metabolic decompensation                           | .        | .    | 1        | 5.3  | .      | .    | 1     | 2.9  |
| Dizziness                                                   | .        | .    | 2        | 10.5 | 3      | 30.0 | 5     | 14.7 |
| Dyspnea                                                     | .        | .    | 1        | 5.3  | .      | .    | 1     | 2.9  |
| Febricula                                                   | .        | .    | 1        | 5.3  | .      | .    | 1     | 2.9  |
| Headaches                                                   | .        | .    | 3        | 15.8 | 1      | 10.0 | 4     | 11.8 |
| Libido decreased                                            | .        | .    | 1        | 5.3  | .      | .    | 1     | 2.9  |



| Post-COVID-19 complications -<br>Regardless of relationship | Severity |   |          |     |        |      |       |      |
|-------------------------------------------------------------|----------|---|----------|-----|--------|------|-------|------|
|                                                             | Mild     |   | Moderate |     | Severe |      | Total |      |
|                                                             | N        | % | N        | %   | N      | %    | N     | %    |
| Male sexual dysfunction                                     | .        | . | 1        | 5.3 | .      | .    | 1     | 2.9  |
| Palpitations                                                | .        | . | 1        | 5.3 | 3      | 30.0 | 4     | 11.8 |
| Phlebitis                                                   | .        | . | 1        | 5.3 | .      | .    | 1     | 2.9  |
| Tremor                                                      | .        | . | 1        | 5.3 | .      | .    | 1     | 2.9  |
| Urinary tract infection                                     | .        | . | 1        | 5.3 | .      | .    | 1     | 2.9  |
| Alanine aminotransferase increased                          | .        | . | .        | .   | 1      | 10.0 | 1     | 2.9  |
| Aspartate aminotransferase increased                        | .        | . | .        | .   | 1      | 10.0 | 1     | 2.9  |
| Blood cholesterol increased                                 | .        | . | .        | .   | 1      | 10.0 | 1     | 2.9  |
| Blood triglycerides increased                               | .        | . | .        | .   | 2      | 20.0 | 2     | 5.9  |
| COVID-19 pneumonia                                          | .        | . | .        | .   | 1      | 10.0 | 1     | 2.9  |
| Epistaxis                                                   | .        | . | .        | .   | 1      | 10.0 | 1     | 2.9  |
| Fibrin D dimer increased                                    | .        | . | .        | .   | 1      | 10.0 | 1     | 2.9  |
| Gamma-glutamyltransferase increased                         | .        | . | .        | .   | 2      | 20.0 | 2     | 5.9  |
| Hyperglycemia                                               | .        | . | .        | .   | 1      | 10.0 | 1     | 2.9  |
| Interstitial lung disease                                   | .        | . | .        | .   | 1      | 10.0 | 1     | 2.9  |
| Low density lipoprotein increased                           | .        | . | .        | .   | 1      | 10.0 | 1     | 2.9  |
| Nasal congestion                                            | .        | . | .        | .   | 1      | 10.0 | 1     | 2.9  |
| Serum ferritin increased                                    | .        | . | .        | .   | 2      | 20.0 | 2     | 5.9  |

N: number.

**Supplementary Table 6.** Six-minute walk test by severity of disease.

| Categorical Endpoints (6MWT) |                                                         |             | Mild |       | Moderate |       | Severe |       | Total |       |
|------------------------------|---------------------------------------------------------|-------------|------|-------|----------|-------|--------|-------|-------|-------|
|                              |                                                         |             | N    | %     | N        | %     | N      | %     | N     | %     |
| <b>Pre-TEST</b>              | <b>Borg scale of dyspnea and fatigue at basal (1)</b>   | <b>0</b>    | 5    | 100.0 | 16       | 84.2  | 10     | 100.0 | 31    | 91.2  |
|                              |                                                         | <b>1</b>    | .    | .     | 1        | 5.3   | .      | .     | 1     | 2.9   |
|                              |                                                         | <b>2</b>    | .    | .     | 2        | 10.5  | .      | .     | 2     | 5.9   |
| <b>Post-TEST</b>             | <b>Borg scale of dyspnea and fatigue after test (1)</b> | <b>0</b>    | 1    | 20.0  | 5        | 26.3  | 5      | 50.0  | 11    | 32.4  |
|                              |                                                         | <b>1</b>    | 2    | 40.0  | 3        | 15.8  | 1      | 10.0  | 6     | 17.6  |
|                              |                                                         | <b>1.5</b>  | .    | .     | .        | .     | 1      | 10.0  | 1     | 2.9   |
|                              |                                                         | <b>2</b>    | .    | .     | 5        | 26.3  | 1      | 10.0  | 6     | 17.6  |
|                              |                                                         | <b>2.5</b>  | 1    | 20.0  | .        | .     | .      | .     | 1     | 2.9   |
|                              |                                                         | <b>3</b>    | .    | .     | 3        | 15.8  | 1      | 10.0  | 4     | 11.8  |
|                              |                                                         | <b>4</b>    | .    | .     | 1        | 5.3   | .      | .     | 1     | 2.9   |
|                              |                                                         | <b>5</b>    | .    | .     | 1        | 5.3   | .      | .     | 1     | 2.9   |
|                              |                                                         | <b>6</b>    | 1    | 20.0  | 1        | 5.3   | .      | .     | 2     | 5.9   |
|                              |                                                         | <b>9</b>    | .    | .     | .        | .     | 1      | 10.0  | 1     | 2.9   |
| <b>Results</b>               | <b>Stopped or paused</b>                                | <b>No</b>   | 5    | 100.0 | 18       | 94.7  | 9      | 90.0  | 32    | 94.1  |
|                              |                                                         | <b>Yes</b>  | .    | .     | 1        | 5.3   | 1      | 10.0  | 2     | 5.9   |
|                              | <b>Symptoms at the end of the exercise</b>              | <b>None</b> | 5    | 100.0 | 19       | 100.0 | 10     | 100.0 | 34    | 100.0 |

(1) 0 (None); 0.5 (Very, very slight), 1 (Very slight); 2 (Slight); 3 (Moderate); 4 (Somewhat severe); 5 (Severe); 6 (Severe); 7 (Very severe); 8 (Very severe); 9 (Very very severe); 10 (Maximal).

6MWT: 6-minute walk test.
